# Supplementary material for: Factors Associated with Increased Knowledge about Breast Density in South Australian Women Undergoing Breast Cancer Screening
Source: MDPI journal article supplement (doi:10.3390/cancers16050893), 2024-02-23
Supplement: s1 [file s1]

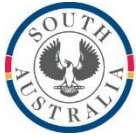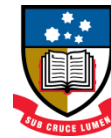

## QUESTIONNAIRE

### Breast/Endocrine Surgical Unit - The Queen Elizabeth Hospital

**Title:** Assessing Patients' Knowledge about Breast Density  
**Protocol Number:** 15681  
**Principal Investigator(s):** Associate Professor Wendy Ingman, Dr Avisak Bhattacharjee, Dr Pallave Dasari, Dr David Walsh, and Ms Leigh Hodson

---

- What language do you speak at home?

English      Other

Please specify \_\_\_\_\_

- Are you being assisted by an interpreter today?

Yes      No      Don't know

**Breast density is a measure of how white the breasts appear on a mammogram. Breasts that appear mostly dark on a mammogram are low density, breasts that appear mostly white on a mammogram are high density.**

- Before now, had you ever heard of breast density?

Yes      No      Don't know

- Do you think women with large breasts are more likely to have dense breast tissue than women with small breasts?

No, strongly disagree      No, disagree      Unsure      Yes, agree      Yes, strongly agree

- Do you think breast density can be determined by feel or touch?

No, strongly disagree      No, disagree      Unsure      Yes, agree      Yes, strongly agree

- Do you think dense breast tissue makes it more difficult to see cancer on a mammogram?

No, strongly disagree      No, disagree      Unsure      Yes, agree      Yes, strongly agree

*Please complete both sides of the page.*

- Do you think that, after a mammogram, sometimes women may require further tests because they have dense breast tissue?  
 No, strongly disagree      No, disagree      Unsure      Yes, agree      Yes, strongly agree
  
- Do you think having breasts that are mostly dense on a mammogram puts you at increased risk for breast cancer?  
 No, strongly disagree      No, disagree      Unsure      Yes, agree      Yes, strongly agree
  
- Have you ever been told by a health professional that your breast tissue is dense?  
 Yes      No      Don't know
- If yes, who told you? A GP, BreastScreen, Radiologist, other, please specify\_\_\_\_\_
  
- Have you ever had a mammogram before?  
 Yes      No      Don't know
  
- You are waiting to have a mammogram at TQEH, and this will show your breast density. Would you like to be told your breast density?  
 Yes      No
  
- The Queen Elizabeth Hospital is conducting a number of studies about breast density. If you are eligible for any studies, would you like a researcher to contact you?  
 Yes      No
